# Supplementary material for: A Physical Activity and Sitting Time Balance Index and Adolescent Psychological Distress: A Prospective Cohort Study
Source: Research Square preprint supplement (doi:10.21203/rs.3.rs-8275371/v1), 2025-12-18

# Supplementary Materials

| Table S1. Sensitivity Analysis: Linear Associations Adjusting for Substance Use (Full Sample) | | |
| --- | --- | --- |
| Predictors | (1) Main Model (Table 2) | (2) Sensitivity Model |
| PASTBI Index | -0.014* | -0.01 |
|  | -0.006 | -0.006 |
| Obesity Status (Ref: Normal) |  |  |
| Overweight/Obese | 0.221 | 0.084 |
|  | -0.205 | -0.196 |
| Interaction Term |  |  |
| Obesity × PASTBI | 0.014 | 0.013 |
|  | -0.017 | -0.017 |
| Key Covariates |  |  |
| Female Sex | 1.217*** | 1.133*** |
|  | -0.136 | -0.133 |
| Baseline Depression (Age 14) | 0.379*** | 0.444*** |
|  | -0.019 | -0.019 |
| Diet Quality Index | 0.205** | 0.181** |
|  | -0.073 | -0.07 |
| Substance Use Controls |  |  |
| Smoker (Ref: Never) | -- | -0.43 |
|  |  | -0.23 |
| Drinker (Ref: Never) | -- | 0.145 |
|  |  | -0.134 |
| Constant | 1.700*** | 0.662* |
|  | -0.324 | -0.336 |
| Observations | 8,753 | 8,624 |
| R-squared | 0.194 | 0.219 |
| Notes: Unstandardized coefficients (Standard Errors in parentheses). All models control for family income and household size (OECD equivalence scale). The sensitivity model (Column 2) additionally controls for cigarette smoking status (Ever/Never) and alcohol consumption status (Ever/Never). * p < 0.05, ** p < 0.01, *** p < 0.001. | | |

| Table S2. Sensitivity Analysis: Non-linear Relationship between PASTBI and Psychological Distress in Adolescents with Obesity (Winsorized Data) | | | | | |
| --- | --- | --- | --- | --- | --- |
| Predictors | Coefficient (β) | Robust SE | t-value | P-value | 95% CI |
| Primary Predictors |  |  |  |  |  |
| PASTBI Index (Winsorized)a | 0.035 | 0.027 | 1.26 | 0.208 | [-0.019, 0.088] |
| PASTBI Squared (Quadratic) | -0.0014 | 0.0009 | -1.52 | 0.129 | [-0.003, 0.000] |
| Covariates |  |  |  |  |  |
| Sex (Female) | 1.453*** | 0.201 | 7.24 | <0.001 | [1.059, 1.847] |
| Baseline Depression (Age 14) | 0.370*** | 0.019 | 19.04 | <0.001 | [0.331, 0.408] |
| Diet Quality Index (Z-score) | 0.053 | 0.099 | 0.53 | 0.594 | [-0.142, 0.247] |
| Model Statistics |  |  |  |  |  |
| Constant | 1.421*** | 0.307 | 4.63 | <0.001 | [0.819, 2.023] |
| Observations (N) | 2,299 |  |  |  |  |
| R-squared | 0.181 |  |  |  |  |
| Calculated Inflection Pointb | 12.76 | 4.55 |  | 0.005 | [3.83, 21.68] |
| Notes: Models were adjusted for sex, baseline depression, and diet quality index. Analysis was restricted to the overweight/obese subsample (N=2,299).aWinsorization:To mitigate the influence of extreme outliers observed in the raw ratio data (Max > 200), the PASTBI variable was Winsorized at the 99th percentile (values > 45.91 were replaced with 45.91).bThreshold Recalibration:The inflection point (threshold for benefit) shifted from 25.0 in the original model to 12.8 in this sensitivity analysis. While the statistical significance of the quadratic term attenuated (*p*=0.129) due to reduced variance, the direction of the coefficient remained consistent (= -0.0013 vs. = -0.0014), and the derived threshold of 12.8 represents a more clinically plausible target for behavioral intervention.*p* < 0.05, ** *p* < 0.01, *** *p* < 0.001. | | | | | |

| Table S3. Sensitivity Analysis: Robustness to Substance Use Confounding (Original Data) | | | |
| --- | --- | --- | --- |
| Predictors | Coefficient (β) | Standard Error (SE) | P-value |
| Linear Term (PASTBI) | 0.04 | 0.024 | 0.096 |
| Quadratic Term (PASTBI2) | -0.0011 | 0.0004 | 0.003 |
| Covariates |  |  |  |
| Female Sex | 1.187 | 0.288 | <0.001 |
| Baseline Depression | 0.452 | 0.042 | <0.001 |
| Diet Quality Index | 0.139 | 0.147 | 0.344 |
| Smoker (Yes) | -0.812 | 0.479 | 0.09 |
| Drinker (Yes) | 0.291 | 0.277 | 0.295 |
| Constant | 0.778 | 0.682 | 0.254 |
| Observations (Subpop) | 2,255 |  |  |
| R-squared | 0.239 |  |  |
| Notes: Analysis restricted to the overweight/obese subpopulation. The highly significant negative quadratic term (p = 0.003) indicates that the non-linear threshold effect remains robust even after adjusting for smoking and alcohol consumption behaviors.This analysis uses the original non-Winsorized PASTBI index to assess stability against confounding from smoking and drinking. | | | |

| Table S4 Moderating Effect of Self-Rated Health (Obese Group Only) | | |
| --- | --- | --- |
| Predictors | Coefficient (β) | P-value |
| PASTBI Index | 0.018 | 0.739 |
| Self-Rated Health | -0.151 | 0.589 |
| Interaction: Health × PASTBI | -0.008 | 0.658 |
| Note: Consistent with previous findings, physical health status does not moderate the effect of PASTBI in obese adolescents. | | |

| Table S5. Coding Scheme for Sedentary Behaviors | | |
| --- | --- | --- |
| Original Survey Response Category (MCS Questionnaire) | Implied Daily Duration (Range) | Imputed Value (Hours/Day) |
| 1. Not at all | 0 mins | 0.00 |
| 2. Less than half an hour | 0 - 29 mins | 0.25 |
| 3. Half an hour to less than 1 hour | 30 - 59 mins | 0.75 |
| 4. 1 hour to less than 2 hours | 1 - 1.99 hours | 1.50 |
| 5. 2 hours to less than 3 hours | 2 - 2.99 hours | 2.50 |
| 6. 3 hours to less than 5 hours | 3 - 4.99 hours | 4.00 |
| 7. 5 hours to less than 7 hours | 5 - 6.99 hours | 6.00 |
| 8. 7 hours or more | 7+ hours | 8.00 |
| Note: For active transport, continuous minutes were reported directly and capped at reasonable limits (e.g., 2 hours). | | |

| Table S6. Composition of Sedentary Time Measures for PASTBI Calculation  Classification of sedentary activities into "Passive" and "Active" domains for mechanism analysis. | | | | |
| --- | --- | --- | --- | --- |
| Activity Domain | Data Source | Included in Total SB (PASTBI Denominator) | Included in Passive SB | Included in Active SB |
| 1. Television Viewing | Self-report | ✓ | ✓ | - |
| 2. Computer Games | Self-report | ✓ | ✓ | - |
| 3. Social Networking | Self-report | ✓ | ✓ | - |
| 4. General Internet Use | Self-report | ✓ | ✓ | - |
| 5. Passive Transport | Self-report | ✓ | ✓ | - |
| 6. Homework / Study | Self-report | ✓ | - | ✓ |
| 7. Reading for Pleasure | Self-report | ✓ | - | ✓ |
| Numerator (PA) | Accelerometer | Total MVPA | Total MVPA | Total MVPA |
| Note: SB = Sedentary Behavior; MVPA = Moderate-to-Vigorous Physical Activity. Total SB is used for the primary PASTBI index. Passive and Active SB are used for secondary mechanism analysis (Table 5 in main text). | | | | |

## Figure S1. STROBE Flowchart of Study Participants

##
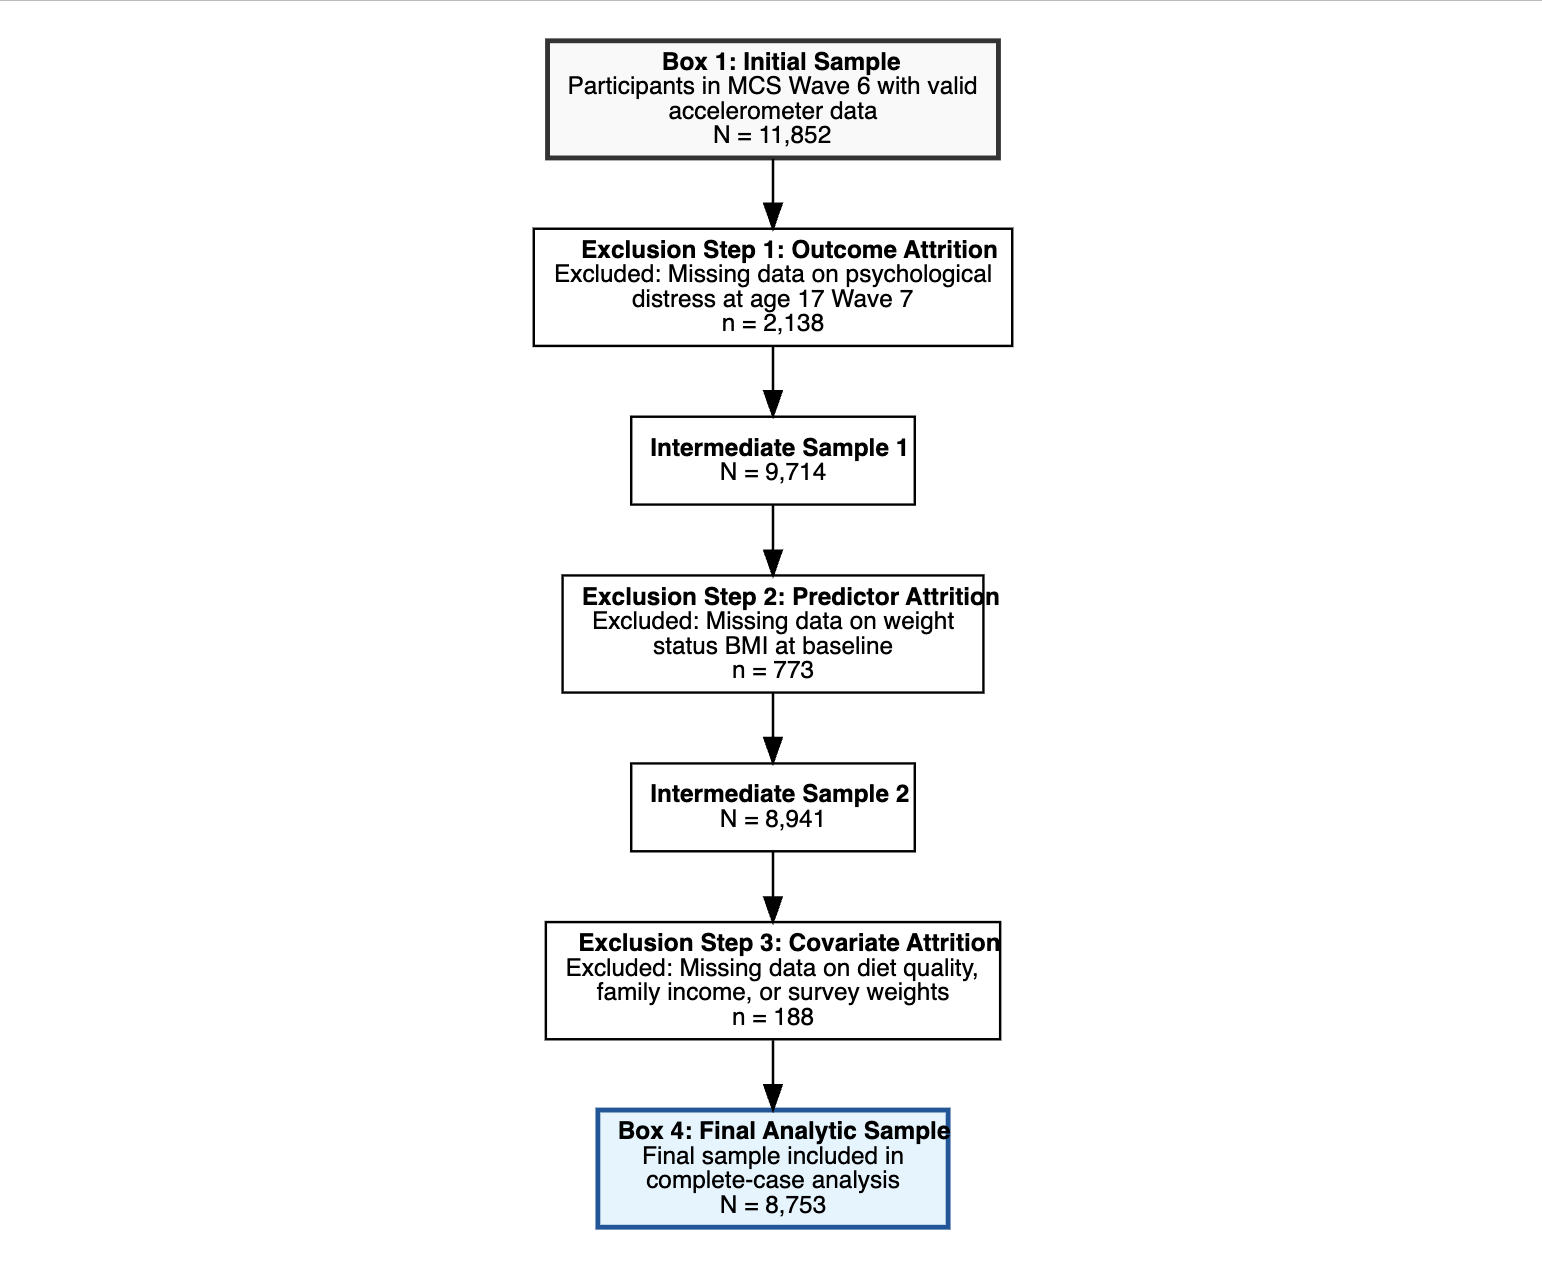


## **Text S1. Construction Methodology of the Standardized Diet Quality Index**

To control for the confounding effects of dietary habits, we constructed a composite **Standardized Diet Quality Index** derived from five key dietary behaviors reported in the MCS Wave 6 survey. The index construction followed a three-step process:

1. Directional Alignment:
   Variables were recoded so that higher values consistently indicate healthier behaviors:
   - *Fruit Consumption:* Reverse coded (Original 1=Frequent $\rightarrow$ New High Score)
   - *Vegetable Consumption:* Reverse coded (Original 1=Frequent $\rightarrow$ New High Score)
   - *Breakfast Frequency:* Retained (Higher days = Healthier)
   - *Fast Food Frequency:* Retained (Higher category = Less frequent = Healthier)
   - *Sugary Drink Consumption:* Retained (Higher category = Less frequent = Healthier)
2. Standardization (Z-scoring):
   Due to differing measurement scales (e.g., "days per week" vs. "frequency categories"), each of the five aligned variables was standardized to a Z-score with a mean of 0 and standard deviation of 1.
3. Composite Calculation:
   The final index was calculated as the mean of the five Z-scores, and then re-standardized to facilitate interpretation.

A higher score indicates a healthier overall diet quality relative to the sample population.


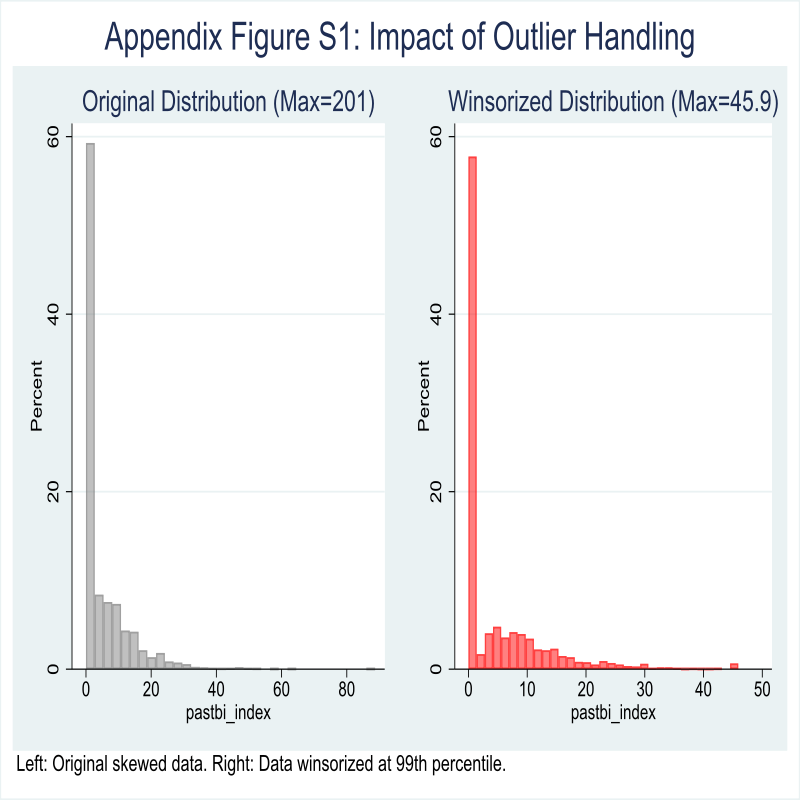

Supplement: Supplementary file 1 [file c3661088c579d1fdb453ca85.docx]
